# Supplementary material
Source: PubMed Central journal article supplement (PMC4309713)
Supplement: AEM.03718-14_zam999116043so1.pdf [file AEM.03718-14_zam999116043so1.pdf]

- 1 **Figure S1.** Glycoside hydrolyses (GH) content in *Streptomyces* and *Mycobacteria*.
- 2 The boxes represent the 25-75 percentiles; the bars represent the 2.5-97.5 percentiles.
- 3

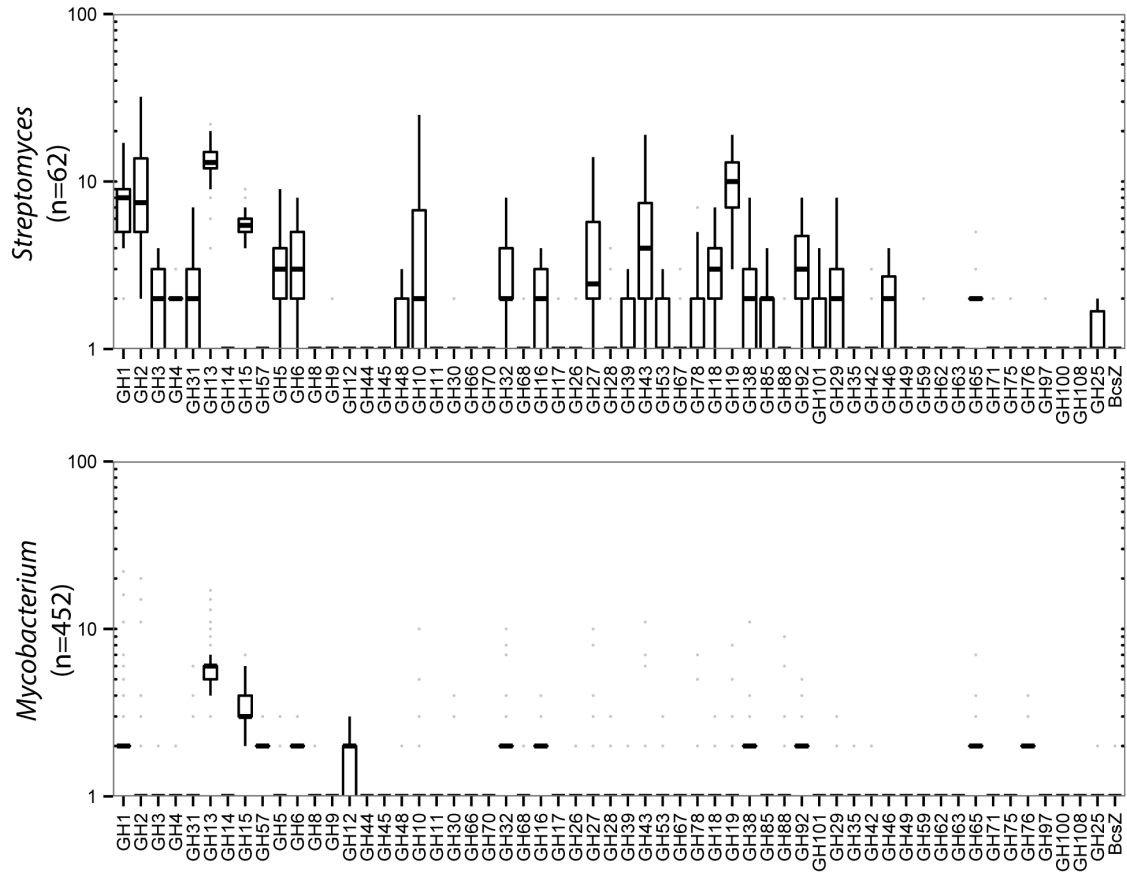

4

5

6 **Table S1.** Glycoside hydrolases (GHs) in sequenced bacterial genomes. Pfam  
7 accession numbers, substrate specificity of characterized enzymes as stated in the  
8 CAZy database, frequency of genomes with specific GH (F), average number of genes  
9 for the GH in genomes having the GH (A), and redundancy index ( $\sigma$ ).

| GH family | Pfam                          | Substrate          | F     | A   | Redundancy ( $\sigma$ ) |
|-----------|-------------------------------|--------------------|-------|-----|-------------------------|
| GH1       | PF00232                       | Oligosaccharides   | 0.53  | 3.1 | 0.78                    |
| GH2       | PF00703<br>PF02836<br>PF02837 | Oligosaccharides   | 0.61  | 3.2 | 0.62                    |
| GH3       | PF00933<br>PF01915            | Oligosaccharides   | 0.61  | 1.7 | 0.50                    |
| GH4       | PF02056<br>PF11975            | Oligosaccharides   | 0.41  | 2.5 | 0.68                    |
| GH5       | PF00150                       | Cellulose          | 0.35  | 1.9 | 0.44                    |
| GH6       | PF01341                       | Cellulose          | 0.06  | 1.5 | 0.25                    |
| GH8       | PF01270                       | Cellulose          | 0.04  | 1.0 | 0.05                    |
| BCSZ      | PF01270                       | Cellulose          | 0.02  | 1.1 | 0.10                    |
| GH9       | PF00759                       | Cellulose          | 0.05  | 1.4 | 0.13                    |
| GH10      | PF00331                       | Xylan              | 0.20  | 2.7 | 0.30                    |
| GH11      | PF00457                       | Xylan              | 0.01  | 1.3 | 0.24                    |
| GH12      | PF01670                       | Cellulose          | 0.08  | 1.1 | 0.05                    |
| GH13      | PF00128                       | Starch/Glycogen    | 0.87  | 6.6 | 0.92                    |
| GH14      | PF01373                       | Starch/Glycogen    | 0.004 | 1.0 | 0.00                    |
| GH15      | PF00723                       | Starch/Glycogen    | 0.25  | 1.5 | 0.35                    |
| GH16      | PF00722                       | O. Plant. Polysac. | 0.13  | 2.1 | 0.49                    |

|      |                               |                    |        |     |      |
|------|-------------------------------|--------------------|--------|-----|------|
| GH18 | PF00704                       | Chitin             | 0.41   | 2.9 | 0.66 |
| GH19 | PF00182                       | Chitin             | 0.31   | 2.5 | 0.29 |
| GH20 | PF00728                       | Oligosaccharides   | 0.33   | 3.7 | 0.74 |
| GH26 | PF02156                       | O. Plant. Polysac. | 0.05   | 1.4 | 0.27 |
| GH28 | PF00295                       | O. Plant. Polysac. | 0.09   | 4.4 | 0.92 |
| GH29 | PF01120                       | Mixed              | 0.13   | 2.5 | 0.51 |
| GH30 | PF02055                       | Xylan              | 0.12   | 1.7 | 0.41 |
| GH31 | PF01055                       | Oligosaccharides   | 0.30   | 1.8 | 0.56 |
| GH32 | PF08244<br>PF00251            | Fructan            | 0.52   | 1.6 | 0.35 |
| GH35 | PF01301                       | Mixed              | 0.10   | 1.4 | 0.29 |
| GH38 | PF01074<br>PF07748            | O. Ani. Polysac.   | 0.28   | 1.4 | 0.25 |
| GH39 | PF01229                       | O. Plant. Polysac. | 0.005  | 1.2 | 0.16 |
| GH42 | PF02449<br>PF08533<br>PF08532 | Mixed              | 0.11   | 1.4 | 0.30 |
| GH43 | PF04616                       | O. Plant. Polysac. | 0.20   | 2.5 | 0.40 |
| GH44 | PF12891                       | Cellulose          | 0.0002 | 1.0 | 0.00 |
| GH45 | PF02015                       | Cellulose          | 0.0001 | 3.0 | 1.00 |
| GH46 | PF01374                       | Mixed              | 0.01   | 1.1 | 0.12 |
| GH48 | PF02011                       | Cellulose          | 0.01   | 1.1 | 0.06 |
| GH49 | PF03718                       | Mixed              | 0.007  | 1.8 | 0.59 |
| GH53 | PF07745                       | O. Plant. Polysac. | 0.09   | 1.1 | 0.10 |
| GH57 | PF03065                       | Starch/Glycogen    | 0.14   | 1.3 | 0.19 |
| GH59 | PF02057                       | Mixed              | 0.002  | 1.3 | 0.25 |
| GH65 | PF03633                       | Starch/Glycogen    | 0.48   | 1.6 | 0.45 |

|       |         |                    |       |     |      |
|-------|---------|--------------------|-------|-----|------|
|       | PF03632 |                    |       |     |      |
|       | PF03636 |                    |       |     |      |
| GH66  | PF13199 | Dextran            | 0.02  | 1.1 | 0.10 |
| GH67  | PF07477 | O. Plant. Polysac. | 0.03  | 2.4 | 0.85 |
|       | PF07488 |                    |       |     |      |
|       | PF03648 |                    |       |     |      |
| GH68  | PF02435 | Fructan            | 0.04  | 1.1 | 0.10 |
| GH70  | PF02324 | Dextran            | 0.03  | 1.0 | 0.03 |
| GH71  | PF03659 | Mixed              | 0.004 | 1   | 0.00 |
| GH75  | PF07335 | Mixed              | 0.001 | 1.0 | 0.08 |
| GH76  | PF03663 | Mixed              | 0.15  | 1.4 | 0.17 |
| GH78  | PF05592 | O. Plant. Polysac. | 0.39  | 1.7 | 0.40 |
| GH85  | PF03644 | Chitin             | 0.07  | 1.6 | 0.50 |
| GH88  | PF07470 | O. Ani. Polysac.   | 0.36  | 2.2 | 0.43 |
| GH92  | PF07971 | O. Ani. Polysac.   | 0.18  | 2.2 | 0.27 |
| GH97  | PF10566 | Mixed              | 0.06  | 1.8 | 0.40 |
| GH100 | PF12899 | Mixed              | 0.05  | 1.0 | 0.04 |
| GH101 | PF12905 | O. Ani. Polysac.   | 0.08  | 1.1 | 0.11 |
| GH108 | PF05838 | Mixed              | 0.05  | 1.1 | 0.11 |

10

11 **Table S3.** Overall GH-based functional dissimilarity (Bray-Curtis) in group of  
 12 genomes with specific 16S rDNA distance.

| 16S rDNA distance | Functional dissimilarity (Bray-Curtis) |       | Fraction of pairwise comparison |
|-------------------|----------------------------------------|-------|---------------------------------|
|                   | Median                                 | Mean  |                                 |
| 0                 | 0.062                                  | 0.086 | 0.58%                           |
| <0.001            | 0.066                                  | 0.090 | 0.79%                           |
| <0.005            | 0.088                                  | 0.103 | 1.29%                           |
| <0.010            | 0.100                                  | 0.124 | 1.63%                           |
| <0.025            | 0.183                                  | 0.227 | 2.74%                           |
| <0.050            | 0.308                                  | 0.284 | 3.86%                           |
| <0.075            | 0.385                                  | 0.367 | 5.27%                           |
| <0.100            | 0.454                                  | 0.442 | 8.06%                           |
| all               | 0.733                                  | 0.719 | 100%                            |

13

14

15 **Table S4.** Spearman correlations between potentials (genes/genome) for  
 16 polysaccharides hydrolysis in sequenced bacterial genomes (all significant  
 17  $P_{\text{Spearman}} < 0.05$ )

|                        | Oli  | Cel   | Xyl  | Chi  | Sta  | Dex  | BcsZ |
|------------------------|------|-------|------|------|------|------|------|
| Oligosaccharides (Oli) |      |       |      |      |      |      |      |
| Cellulose (Cel)        | 0.22 |       |      |      |      |      |      |
| Xylan (Xyl)            | 0.48 | 0.14  |      |      |      |      |      |
| Chitin (Chi)           | 0.44 | 0.48  | 0.20 |      |      |      |      |
| Starch/Glycogen (Sta)  | 0.60 | 0.23  | 0.42 | 0.39 |      |      |      |
| Dextran (Dex)          | 0.46 | -0.15 | 0.22 | 0.21 | 0.44 |      |      |
| Fructan (Fru)          | 0.52 | 0.16  | 0.21 | 0.14 | 0.30 | 0.27 |      |
| BcsZ                   | 0.41 | -0.14 | 0.32 | 0.12 | 0.36 | 0.45 | 0.06 |

18
